# Supplementary material for: Systemic EP4 Inhibition Increases Adhesion Formation in a Murine Model of Flexor Tendon Repair
Source: PLoS One. 2015 Aug 27;10(8):e0136351. doi: 10.1371/journal.pone.0136351 (PMC4552471; doi:10.1371/journal.pone.0136351)
Supplement: S2 File — (XLSX) [file pone.0136351.s002.xlsx]

## Sheet: qPCR
F4/80
	Vehicle			EP4 Antagonist
	Mean	SD	n	Mean	SD	n
3	1	0.181715	3
7	0.141645	0.112402	3	0.722067	0.282975	3
10	0.623919	0.17356	3	0.219102	0.0819492	3
14	0.142069	0.108324	3	0.211301	0.0535235	3
21	0.425847	0.458893	3	0.385508	0.0348563	3
Col3a1
	Vehicle			EP4 Antagonist
	Mean	SD	n	Mean	SD	n
3	1	0.70135	3
7	0.873438	0.812868	3	2.81746	0.885844	3
10	2.65488	0.782154	3	1.24287	1.11716	3
14	0.437458	0.137071	3	0.292282	0.161584	3
21	0.511949	0.314488	3	0.528351	0.269594	3
Col1a1
	Vehicle			EP4 Antagonist
	Mean	SD	n	Mean	SD	n
3	1	0.109128	3
7	2.28559	0.492409	3	3.65457	1.11279	3
10	2.16049	1.06525	3	0.31236	0.118012	3
14	0.596613	0.185587	3	0.70951	0.457393	3
21	1.1589	0.916324	3	0.911067	0.192462	3
Mmp2
	Vehicle			EP4 Antagonist
	Mean	SD	n	Mean	SD	n
3	1	0.154385	3
7	2.91787	1.16043	3	5.15458	1.95445	3
10	16.7362	3.00654	3	7.81518	1.15037	3
14	4.82963	1.72846	3	11.7467	3.70792	3
21	9.68927	4.15362	3	20.418	3.69185	3
Mmp9
	Vehicle			EP4 Antagonist
	Mean	SD	n	Mean	SD	n
3	1	0.294635	3
7	4.13087	1.92541	3	1.87976	0.938883	3
10	1.80195	0.211478	3	2.30165	0.491378	3
14	2.2658	0.998459	3	5.82107	1.44507	3
21	3.01662	0.473476	3	9.21868	1.0495	3

## Sheet: Biomechanics
Maximum Load
	Vehicle			EP4
Day	Mean	SD	n	Mean	SD	n
10	1.04	0.531977	5	0.583333	0.271416	6
14	0.833333	0.10328	6	1.16	0.288097	5
21	1.54	0.397492	5	1.83333	0.516398	6
28	2.63333	0.350238	6	2.55	0.739595	6
Stiffness
	Vehicle			EP4
Day	Mean	SD	n	Mean	SD	n
10	2.2	0.447214	5	2.16667	0.752773	6
14	3	1.09545	6	3.8	1.09545	5
21	5.8	1.09545	5	4.5	1.51658	6
28	5.5	0.83666	6	6	1.89737	6

## Sheet: Gliding
REPAIRS
Gliding Resistance (alpha)
	Saline			EP4
	Mean	SD	n	Mean	SD	n
10	27.5028	26.0358	6	58.773	37.6465	6
14	89.355	87.5967	5	87.2086	49.4343	5
21	16.5309	7.26159	5	33.3345	18.9172	6
28	20.7612	11.2228	6	10.987	7.34856	5
MTP ROM
	Saline			EP4
	Mean	SD	n	Mean	SD	n
10	42.7911	19.8654	6	24.6081	15.6087	6
14	22.131	16.6334	5	16.8676	14.009	5
21	44.7699	9.0898	5	31.4992	11.9101	6
28	41.5566	12.4505	6	53.8337	8.49488	5

## Sheet: cAMP
		cAMP (pmol/mL)	SEM	n
	Saline	4.26035	0.109327	3
	EP4	2.14504	0.0550676	3
		cAMP (pmol/mL)	SEM	n
	Saline	4.26035	0.109327	3
	EP4	2.14504	0.0550676	3
